# Supplementary material
Source: PubMed Central journal article supplement (PMC5319856)
Supplement: NIHMS6558-supplement-Supplementary_Table.pdf [file NIHMS6558-supplement-Supplementary_Table.pdf]

**Supplementary Table.**

Adjusted odds ratios for the interpregnancy interval and autism spectrum disorder among second-born children from sibling pairs born in Manitoba to the same mother between January 1, 1988 and March 31, 2005, where no record of autism spectrum disorder found for first-born siblings, stratified by second child's sex, intellectual disability (child), year of birth, and maternal age at delivery

|                                        | Adjusted* OR (95% CI)           |                  |                                 |                   |
|----------------------------------------|---------------------------------|------------------|---------------------------------|-------------------|
|                                        | Case Group 2†                   |                  | Case Group 3‡                   |                   |
|                                        | Interpregnancy interval, months |                  | Interpregnancy interval, months |                   |
|                                        | <12                             | 12–23            | <12                             | 12–23             |
| <b>Child's sex</b>                     |                                 |                  |                                 |                   |
| Boy                                    | 1.29 (0.89-1.87)                | 1.15 (0.82-1.63) | 1.80 (0.93-3.48)                | 1.83 (1.00-3.36)  |
| Girl                                   | 1.64 (0.78-3.47)                | 1.35 (0.67-2.74) | 1.48 (0.47-4.63)                | 0.92 (0.30-2.79)  |
| p-value                                | .57                             | .69              | .77                             | .28               |
| <b>Intellectual disability (child)</b> |                                 |                  |                                 |                   |
| Yes                                    | 1.32 (0.62-2.81)                | 2.50 (1.25-4.98) | 1.25 (0.45-3.46)                | 2.69 (1.10-6.61)  |
| No                                     | 1.39 (0.97-2.00)                | 0.98 (0.69-1.38) | 2.01 (1.02-3.96)                | 1.18 (0.61-2.28)  |
| p-value                                | .90                             | .02              | .44                             | .14               |
| <b>Year of birth</b>                   |                                 |                  |                                 |                   |
| 1998 or earlier                        | 1.37 (0.88-2.13)                | 1.19 (0.78-1.80) | 1.39 (0.71-2.70)                | 1.21 (0.65-2.25)  |
| 1999 or later                          | 1.34 (0.79-2.25)                | 1.20 (0.76-1.91) | 2.42 (0.75-7.80)                | 2.80 (1.00-7.84)  |
| p-value                                | .94                             | .96              | .42                             | .17               |
| <b>Maternal age at delivery, years</b> |                                 |                  |                                 |                   |
| ≥35                                    | 1.03 (0.43-2.47)                | 0.96 (0.46-2.03) | 0.72 (0.20-2.65)                | 1.04 (0.38-2.89)  |
| 30–34                                  | 2.07 (1.14-3.76)                | 1.60 (0.94-2.71) | 4.84 (1.53-15.38)               | 4.20 (1.44-12.25) |
| 30–34                                  | 1.12 (0.71-1.75)                | 1.02 (0.66-1.59) | 1.14 (0.51-2.58)                | 0.93 (0.41-2.09)  |
| <30                                    |                                 |                  |                                 |                   |

|         |     |     |     |     |
|---------|-----|-----|-----|-----|
| p-value | .22 | .37 | .06 | .07 |
|---------|-----|-----|-----|-----|

OR: Odds ratio

CI: Confidence interval

Note: In all cases, the reference category is  $\geq 36$  months. P-values are based on contrast tests.

\* Models adjusted for child's sex, mean-centered birth year, mean-centered birth year squared, intellectual disability (child), maternal age at delivery, whether mother ever received income assistance

† At least two autism spectrum disorder (ASD) codes in one of the following databases: Medical Services, Hospital Discharge Abstracts or Education; or at least one ASD code in two or more of the following databases: Medical Services, Hospital Discharge Abstracts, Education, or Children's Special Services dataset

‡ Record in the Children's Special Services dataset
